# Supplementary material
Source: PubMed Central journal article supplement (PMC4576029)
Supplement: AAC.01452-15_zac010154427so1.pdf [file AAC.01452-15_zac010154427so1.pdf]

| STRAND | CDS NUMBER/GENE NAME       | PREDICTED FUNCTION                                                                                                 | START (nt) | END (nt) | LENGHT (bp) | SIMILAR PROTEIN ACCESSION NUMBER | SIMILAR PROTEIN ORGANISM                 | % ID | Query coverage |
|--------|----------------------------|--------------------------------------------------------------------------------------------------------------------|------------|----------|-------------|----------------------------------|------------------------------------------|------|----------------|
| -      | CDS 1                      | phage resistance protein                                                                                           | 1          | 1542     | 1542        | AHE69901                         | <i>Enterobacter ludwigii</i> P101        | 100  | 100            |
| -      | <i>spr(yeiV)</i>           | membrane protein                                                                                                   | 1670       | 2107     | 438         | EUM29602                         | <i>Enterobacter ludwigii</i> EN-119      | 100  | 100            |
| -      | CDS 2                      | membrane protein                                                                                                   | 2656       | 3381     | 726         | KIF86397.1                       | <i>Enterobacter ludwigii</i> EN-119      | 100  | 100            |
| -      | CDS 3                      | hypothetical protein                                                                                               | 3403       | 4389     | 987         | KIF86396.1                       | <i>Enterobacter ludwigii</i> EN-119      | 99   | 100            |
| -      | CDS 4                      | D-mannonate oxidoreductase                                                                                         | 4513       | 5979     | 1467        | KIF86395.1                       | <i>Enterobacter ludwigii</i> EN-119      | 99   | 100            |
| +      | CDS 5                      | mannonate dehydratase                                                                                              | 6184       | 7374     | 1191        | EUM09581                         | <i>Enterobacter</i> sp. BIDMC 30         | 100  | 100            |
| -      | CDS 6                      | elongation factor P                                                                                                | 7418       | 7990     | 573         | KIF86393.1                       | <i>Enterobacter ludwigii</i> EN-119      | 100  | 100            |
| -      | CDS 7                      | putative membrane protein/membrane-anchored nucleotide-binding enzyme                                              | 8274       | 9365     | 1092        | KJW84079                         | <i>Enterobacter cloacae</i> CIDEIMsCOL5  | 97   | 100            |
| +      | CDS 8                      | Predicted Fe-S-cluster oxidoreductase containing a putative zinc- or iron-chelating domain                         | 9601       | 9879     | 279         | KGB13761                         | <i>Enterobacter cloacae</i> ATCC 13047   | 86   | 100            |
| -      | CDS 9                      | hypothetical protein                                                                                               | 9882       | 10475    | 594         | KJC09859                         | <i>Citrobacter freundii</i> MRSN 11938   | 97   | 100            |
| +      | CDS 10                     | hypothetical protein                                                                                               | 11057      | 11623    | 567         | EWD81767                         | <i>Klebsiella pneumoniae</i> UCI 18      | 91   | 77             |
| +      | <i>mcsS</i> -like          | similar to class IIa microcin S precursor McsS                                                                     | 12368      | 12730    | 363         | YP_006954535                     | <i>Escherichia coli</i> G3/10            | 73   | 100            |
| +      | <i>mcpl</i> -like          | similar to microcin immunity protein                                                                               | 12756      | 12953    | 198         | YP_006954413.1                   | <i>Escherichia coli</i> EC25             | 76   | 93             |
| +      | <i>mcsI</i> -like          | similar to McsS self-immunity protein                                                                              | 12963      | 13613    | 651         | YP_006954534                     | <i>Escherichia coli</i> G3/10            | 74   | 100            |
| +      | <i>mcsA</i> -like          | putative hemolysin secretion protein, HlyD family                                                                  | 13616      | 14869    | 1254        | YP_006954533                     | <i>Escherichia coli</i> G3/10            | 90   | 100            |
| +      | <i>mcsB</i> -like          | putative Colicin V secretion ABC transporter ATP-binding protein; bacteriocin/lantibiotic exporters; peptidase C39 | 14869      | 17073    | 2205        | YP_006954532                     | <i>Escherichia coli</i> G3/10            | 89   | 98             |
| -      | CDS 11                     | Site-specific serine recombinases, DNA invertase Pin homolog. Partitioning (par)-Resolvase subfamily.              | 17203      | 17817    | 615         | KJO38188                         | <i>Enterobacter asburiae</i> 35009       | 98   | 100            |
| +      | CDS 12                     | hypothetical protein                                                                                               | 18133      | 19236    | 1104        | CFQ99063                         | <i>Yersinia enterocolitica</i> SZ662/97  | 90   | 100            |
| +      | CDS 13                     | hypothetical protein                                                                                               | 19233      | 20180    | 948         | CFQ99070                         | <i>Yersinia enterocolitica</i> SZ662/97  | 85   | 100            |
| -      | CDS 14                     | hypothetical protein                                                                                               | 20532      | 21128    | 597         | KJC10670                         | <i>Citrobacter freundii</i> MRSN 12115   | 77   | 100            |
| -      | CDS 15                     | hypothetical protein                                                                                               | 21112      | 21480    | 369         | KGY86150                         | <i>Citrobacter freundii</i> FDAARGOS_73  | 88   | 99             |
| -      | CDS 16                     | hypothetical protein                                                                                               | 21470      | 22324    | 855         | EOD60026                         | <i>Citrobacter freundii</i> GTC 09629    | 97   | 89             |
| -      | CDS 17                     | putative resolvase with a recombinase zinc beta ribbon domain                                                      | 22494      | 24410    | 1917        | AKE59181                         | <i>Citrobacter amalonaticus</i> Y19      | 98   | 100            |
| -      | CDS 18                     | putative 4-amino-4-deoxy-L-arabinose transferase and related glycosyltransferases of PMT family                    | 26438      | 27871    | 1434        | ACR70138                         | <i>Edwardsiella ictaluri</i> 93-146      | 60   | 99             |
| -      | CDS 19                     | hypothetical protein                                                                                               | 29211      | 29711    | 501         | AGZ03780                         | <i>Serratia marcescens</i> N11-2820      | 47   | 92             |
| -      | <i>bla<sub>NMC-A</sub></i> | class A beta-lactamase                                                                                             | 29756      | 30634    | 879         | CAA79967                         | <i>Enterobacter asburiae</i> NOR-1       | 100  | 100            |
| +      | <i>nmc-R</i>               | transcriptional regulator                                                                                          | 30776      | 31663    | 888         | CAA79966                         | <i>Enterobacter asburiae</i> NOR-1       | 100  | 100            |
| +      | <i>smvA_2</i> -like        | major facilitator superfamily protein, similar to methyl viologen resistance protein SmvA                          | 32458      | 33966    | 1509        | CNH32633                         | <i>Yersinia intermedia</i> IP10066       | 52   | 95             |
| +      | CDS 20                     | ATP-binding cassette domain of non-transporter proteins; ABC-type Class 2                                          | 34232      | 34969    | 738         | ADG18478                         | <i>Burkholdera</i> sp. CCGE1002          | 60   | 97             |
| -      | CDS 21                     | hypothetical protein                                                                                               | 35215      | 36267    | 1053        | GAB53007                         | <i>Escherichia hermannii</i> NBRC 105704 | 50   | 90             |
| +      | CDS 22                     | Fe-S-cluster oxidoreductase                                                                                        | 37355      | 37552    | 198         | KJN60966                         | <i>Enterobacter cloacae</i> 35638        | 92   | 98             |
| -      | CDS 23                     | sugar efflux transporter B                                                                                         | 37549      | 38730    | 1182        | EUM09584                         | <i>Enterobacter</i> sp. BIDMC 30         | 99   | 100            |
| +      | CDS 24                     | hypothetical protein                                                                                               | 38875      | 39018    | 144         | AHE72828                         | <i>Enterobacter cloacae</i> P101         | 100  | 100            |
| +      | CDS 25                     | PTS fructose transporter subunit IIA                                                                               | 39091      | 40221    | 1131        | AHE69910                         | <i>Enterobacter cloacae</i> P101         | 100  | 100            |
| +      | <i>fruK</i>                | 1-phosphofructokinase                                                                                              | 40221      | 41159    | 939         | KIF86389.1                       | <i>Enterobacter ludwigii</i> EN-119      | 100  | 100            |
| +      | CDS 26                     | PTS fructose transporter subunit IIBC                                                                              | 41176      | 42858    | 1683        | KIF86388.1                       | <i>Enterobacter ludwigii</i> EN-119      | 100  | 100            |
| -      | CDS 27                     | endonuclease IV                                                                                                    | 42906      | 43763    | 858         | KIF86387                         | <i>Enterobacter ludwigii</i> EN-119      | 100  | 100            |
| -      | CDS 28                     | hypothetical protein                                                                                               | 43828      | 44874    | 1047        | EUM29590                         | <i>Enterobacter</i> sp. BIDMC 26         | 100  | 100            |

Table S1. List of coding sequences (CDSs) reported in the GenBank record no. KR919803, which includes the EludIMEX-1 element and flanking regions of the *E. ludwigii* AOU-8/14 genome. Similarities of protein products with proteins from non-redundant sequence database, detected using the blastp web tool (<http://blast.ncbi.nlm.nih.gov/Blast.cgi?PROGRAM=blastp>) are also reported. Coding sequences present in the EludIMEX-1 element are shaded in grey. Coding sequences are progressively numbered from the beginning of the record, unless a gene name was assigned based on sequence similarity.
